# Supplementary material for: Ablation of Mto1 in zebrafish exhibited hypertrophic cardiomyopathy manifested by mitochondrion RNA maturation deficiency
Source: Oxford University Press journal article supplement (doi:10.1093/nar/gkab228), 2021-03-22
Supplement: gkab228_supplemental_file.pdf [file gkab228_supplemental_file.pdf]

## **Supplemental Data**

**Figure S1**

**Figure S2**

**Figure S3**

**Figure S4**

**Figure S5**

**Table S1**

**Table S2**

```

      *      20      *      40      *      60      *      80      *      100     *      120     *
D.rerio  : MLVRR-----LQFKT---LSTCSIEASNIHQYDVIIVGGGHAGSEAVAAASRIGAKTLLITQKTIQTIGALSCNPSLGGVKGHLVREIDALDGMGRAGDWAQTHFSILNRSKGPVAVGLRAQLDRQR : 123
H.sapiens : MFYFRGCGRVAASLTKQFPLARLSSDSAAPRTPHFDVIVIGGGHAGTEAATAAARCGSRLLLLLHVRVDTIGQMSCNPSFGGIGKGLHREVDALDGLCSRICDQSGVHYKVLNRRKGPVAVGLRAQIDRKL : 133
M.musculus : MFLLRGRGHVAAASLGR--LPLRRLRSDSAAPCTPHFDVVVIGGGHAGTEAATAAARCGSRLLLLLHVRVDTIGQMSCNPSFGGIGKGLHREVDALDGLCSRICDQSGVHYKVLNRRKGPVAVGLRAQIDRKL : 132
B.taurus  : MFCIRGCGRVAASLTKQHLASVRFGGDSAAAPWTPHFDVVVIGGGHAGTEAATAAARCGSRLLLLLHVRVDTIGQMSCNPSFGGIGKGLHREVDALDGLCSRICDQSGVHYKVLNRRKGPVAVGLRAQIDRKL : 133
tr|C.lupus : MFSVRGCGLWVVASLTKKHLPLARFIGDGAAPSAFPHFDVVVIGGGHAGTEAATAAARCGSRLLLLLHVRVDTIGQMSCNPSFGGIGKGLHREVDALDGLCSRICDQSGVHYKVLNRRKGPVAVGLRAQIDRKL : 133
R.norvegic : MFLLRDCGRWASASLGR--LPLRRLRSDSAAPCSPHFDVVVIGGGHAGTEAATAAARCGSRLLLLLHVRVDTIGQMSCNPSFGGIGKGLHREVDALDGLCSRICDQSGVHYKVLNRRKGPVAVGLRAQIDRKL : 132
C.elegans : MLSKS-----TRLR-----CFQ-----TDVIVIGGGHAGCEAATAAARCGSNLTVLVQNKNTIGEMSCNPSFGGIGKGLHREVDALDGLCARICDKGATTYQALNRAQGPVAVGLRAQIDRKL : 113
      M r      4      DV6V6GGGHAG EaaaaAaRcGs T6L6T      TIG 6SCNPSFGG6K6GHL6RE6DALD6c R cD sg6h5 LNR kGPVAVGLRAQ6DRKL

      *      140     *      160     *      180     *      200     *      220     *      240     *      260
D.rerio  : YKDMQSEILSTPLVILLEGSVQDLLLADLGGKPKRHKVYGIQANGGGHSHSSVVLTTGTFLRGMVEMQNTTEGGRMGDPPSCAGTSHNKVILGLKIGRLRTGTTPRIVKDSIDFSITSVCLPDSPT : 256
H.sapiens : YKQNMQREIINTPLLVQEGAVEDLILTEPEEHTGKORVSGVVLADGS--IVYAESVILTTGTFLRGMVIGIETHPAGRLGDPSS--IGLAQTIEK--LGEVVGRLKGTTPPRIAKESINFSILNKHIPDNPSI : 263
M.musculus : YKQNMQREIINTPLLVQEGAVEDLVLAEPEEGYGGKSRVGVVLADGS--IVYAESVILTTGTFLRGMVIGIEMHPAGRLGDPSS--IGLAQTIEK--LGEVVGRLKGTTPPRIAKESINFSILNKHTPDPDSI : 262
B.taurus  : YKQNMQREIINTPLLVQEGAVEDLILTEPEEHTGKORVSGVVLADGS--KVYAESVVLTTGTFLRGMVIGIEMHPAGRLGDPSS--VGLAQTIEK--LGEVVGRLKGTTPPRIAKESVNFSLNKQTPDNPSI : 263
tr|C.lupus : YKRMQREIINTPLLVQEGAVEDLILTEPEEHTGKORVSGVVLADGS--IVYAESVVLTTGTFLRGMVIGIEMHPAGRLGDPSS--VGLAQTIEK--LGEVVGRLKGTTPPRIAKESVNFSLNKQTPDNPSI : 263
R.norvegic : YKQNMQREIINTPLLVQEGAVEDLVLAEPEEGYGGKSRVGVVLADGS--IVYAESVVLTTGTFLRGMVIGIEMHPAGRLGDPSS--IGLAQTIEK--LGEVVGRLKGTTPPRIAKESINFSILHEHTADNPSI : 262
C.elegans : YKQNMQREIINTPLLVQEGAVEDLILTEPEEHTGKORVSGVVLADGS--IVYAESVVLTTGTFLRGMVIGIEMHPAGRLGDPSS--VGLAQTIEK--LGEVVGRLKGTTPPRIAKESVNFSLNKQTPDNPSI : 263
      YK MQ E6l Tpl6t6 eG V dL66 e p gk 46 G6 6 lq 6 sV66TTGTFLrg 6 G PaGR6d ps gL l k lGf 6GRl4TGTTPPR6 K S6lFS pD i

      *      280     *      300     *      320     *      340     *      360     *      380     *      40
D.rerio  : PFSFINKHHTCTEKEQLPCFLIYTHTEGVEKVKESSHHNSHIQDIKPRYCPYSIESKVLRFEGRHQVWLEPEGMTSLIYYPQGLSMTLEMQRLRLREIPLGCHAKIQE----- : 369
H.sapiens : PFSFINETVWIKPEDQLPCYLTHTNPRVDEIVLENLHNSHVKETTTRGPRYCPYSIESKVLRFENRHQVWLEPEGMDSLIIYYPQGLSMTLPAELQEKMITCIRGLEKAKVIQEDGVLLLLPRMECNGAISAHH : 396
M.musculus : PFSFLSDSVWIKPEDQLPCYLTHTNPRVDAIVLENLHNSHVQETTTRGPRYCPYSIESKVLRFENRHQVWLEPEGMDSLIIYYPQGLSVTLPAELQEKMITCIRGLEKAKMVHE----- : 375
B.taurus  : PFSFINQTVWIKPEDQLPCYLTHTNPRVDEIVLENLHNSHVKETTTRGPRYCPYSIESKVLRFENRHQVWLEPEGMDSLIIYYPQGLSVTLPAELQEKMITCIRGLEKAKVIQEDGVLLLLPRMECNGAISAHH : 376
tr|C.lupus : PFSFVSETVWIKPEDQLPCYLTHTNPRVDEIVLENLHNSHVKETTTRGPRYCPYSIESKVLRFENRHQVWLEPEGMDSLIIYYPQGLSVTLPAELQEKMITCIRGLEKAKVIQEDGVLLLLPRMECNGAISAHH : 376
R.norvegic : PFSFLSDDVWIKPEDQLPCYLTHTNPRVDELIVLENLHNSHVKETTTRGPRYCPYSIESKVLRFENRHQVWLEPEGMDSLIIYYPQGLSVTLPAELQEKMITCIRGLEKAKMVHE----- : 375
C.elegans : PFSFLTKNWNISYEDQLPTIYGHTEDEVCFRIGNENMHNVCVASETTSRPRYCPYSLESKLLRFKLEHRLFLBHEGLDSEPHIYPQGLSMTLFFKPEVQTCILRAIEGLENVEIFQE----- : 348
      PFSF vwi pedQLpC5LthTnp V 6v en H1N h6 t gPRYCP6E6K6LRFr r Hq65LEpEG6dS 16YPQG6S6T p E6Q 66 I GL2 ak6 P

      0      *      420     *      440     *      460     *      480     *      500     *      520     *
D.rerio  : ----GYGVQYDFVCTQTFPFLQLKNTGCLLHLAGQINGTTGYEAAAAGVWAGVNAAGRTSLSMSLSLSRTQSYIGVLIDDLVCHGVTEPYRMFTSRAEFRSLRPNADRLTLRGEFEEIGCVSEQRYNKA : 497
H.sapiens : NLPPLGYGVQYDYLDRQITPSLETHLVQRLFEAGQINGTTGYEAAAAGVWAGINASLFRVSRKPFVVSRTTEGYIGVLIDDLTTLGSEPYRMFTSRVEFRSLRPNADSLRSLRGLYKADAGCVSQRYERA : 529
M.musculus : ----GYGVQYDYLDRQITPSLETHLVQRLFEAGQINGTTGYEAAAAGVWAGINASLFRVSRKPFVVSRTTEGYIGVLIDDLTTLGSEPYRMFTSRVEFRSLRPNADRLTLRFAHKEAGCVSSQRYERA : 503
B.taurus  : ----GYGVQYDYLDRQITPSLETHLVQRLFEAGQINGTTGYEAAAAGVWAGINASLFRVSRKPFVVSRTTEGYIGVLIDDLTTLGSEPYRMFTSRVEFRSLRPNADSLRSLRGLYKADAGCVSQRYERA : 504
tr|C.lupus : ----GYGVQYDYLDRQITPSLETHLVQRLFEAGQINGTTGYEAAAAGVWAGINASLFRVSRKPFVVSRTTEGYIGVLIDDLTTLGSEPYRMFTSRVEFRSLRPNADSLRSLRGLYKADAGCVSQRYERA : 504
R.norvegic : ----YGVQYIYLEIPVRSSSRDAFVQRLFLSQINGTTIANEAAAAGVWAGINASLFRVSRKPFVVSRTTEGYIGVLIDDLTTLGSEPYRMFTSRVEFRSLRPNADRLTLRFAHEDAGCVSPQRYKRA : 499
C.elegans : ----GYGVQYDFVNEKQIKRRLIETRKVEGMBLAGQINGTTGYEAAAAGVWAGINASLFRVSRKPFVVSRTTEGYIGVLIDDLTTLGSEPYRMFTSRVEFRSLRPNADRLTLRGLRHHN-AISDNRWAIF : 475
      gYGVQYd56 p q l v2 6F aQINGTTgyEAAAAGq aG6NAs r pp srt YIGVLIDDLt Gt EPYRMFTSR EFRlSLrPNAD RLT r gc6S qR5 a

      540     *      560     *      580     *      600     *      620     *      640     *      660
D.rerio  : LLVQASIKCALSTIQSIHLSAARWRDKTGG-VTISKTKSSIIINGVEVLQKDVTFQMLASSFQELFPGHL---EHSERLKVEMVHPHCEKCRREMEKMTETESISLENDIDYIATP--ISLSQEVREILDRVR : 625
H.sapiens : CWMRSSLIEEGISVLKSIIEFLSSKWKRIIEQ-ASISISRSLEVRALDVLKVEEVDMSLAKAVEPEPLKKYTKRELAERLKIETATYESVLFHQCEIKEVQDEALQLEKLDYLTIRDVLSQEVREKILHFSR : 661
M.musculus : LWMRSSLIEEGISVLKSIKFSKWKRIIEQ-IPISINRSLEVSALDVLKVEEVDMSLAVGVLPEPLEKYTACRELAERLKIETATYESVLSYQLQEIKEVQDEALQLEKLDYLTIRDVLSQEVREKILHLSR : 635
B.taurus  : SWMRSSLIEEGISVLKSIIEFLSKWKRIIEQ-SSISSGKSLERLALDVLKVEEVDMLARAVPEPEPLKKYTQCRELAERLKIETATYESVLFHQCEIKEVQDEALQLEKLDYLTIRDVLSQEVREKILHFSR : 636
tr|C.lupus : SWMRSSLIEEGISVLKSIIEFSSKWKRIIEQ-ASISIVKSLERLALDVLKVEEVDMLAKAVEPEPLKKYVESRELAERLKIETATYESVLFHQCEIKEVQDEALQLEKLDYLTIRDVLSQEVREKILHFSR : 636
R.norvegic : LWMRSSLIEEGISVLKSIKFSKWKRIIEQ-APISINRSLEVSALDVLKVEEVDMSLAVGVLPEPEPLKKYTACRELAERLKIETATYESVLLYQLQEIKEVQDEALQLEKLDYLTIRDVLSQEVREKILHLSR : 631
C.elegans : TETGEBNNLTQRTEEMKMSVWKRIIEKLAATSRRNDGKVLSEFDLTHRYDLKSLLELCIKD--KNIG--EDHLERLKIETATYESVLLYQLQEIKEVQDEALQLEKLDYLTIRDVLSQEVREKILHFSR : 602
      k sL s l s6 4W4 6p iS s 6 a d66 y 6d L e e6 RLK6Ea Y q 6q eal 6P D5lt6 s6S EvrEkl R

      *      680     *      700     *      720
D.rerio  : ESILGAARLPGITPAAIIVHLENYVHRNKHNNM----- : 659
H.sapiens : PQTIGAASRIPGVTAAIINLLRFVNTTQRRQSAMNESSKTDQYLCADRLQEREL : 717
M.musculus : PQTIGAASRIPGVTAAIINLLRFVNTTQRRQSAMNESSKTDQYLCADRLQEREL : 669
B.taurus  : PQTIGAASRIPGVTAAIIVNLLRFVNTTQRRQAAMNRIPKTDQQLHDTDRLEESQL : 692
tr|C.lupus : PQTIGAASRIPGVTAAIINLLRFVNTTQRRQMAIN----- : 672
R.norvegic : PQTIGAASRIPGVTAAIINLLRFVNTTQRRQAAMNRIPKTDQQLHDTDRLEESQL : 661
C.elegans : ERNTPAATRISGITPEAVVLMRHLNPAVPRSSAV----- : 638
      P t6gAA R6pG6TpaAI6 L r 6

      Identity
      52.7%
      52.4%
      53.2%
      52.9%
      51.5%
      44.2%

```

**Supplemental Figure S1:** Amino acid sequence multiple alignment of the MTO1 family encompassing *D.rerio*, *H.sapiens*, *M.musculus*, *R.Norvegicus*, *C.lupus*, *B.taurus*, and *C.elegans* performed using ClustalW. zebrafish Mto1 shares about 52.7% sequence identity with human MTO1 .(*Danio rerio*: NP\_001076478.1; *Homo sapiens*: NP\_598400.1; *Mus musculus*: NP\_080934.2; *Rattus norvegicus*: NP\_001100311.1; *Canis lupus*: XP\_532202.4; *BosTaurus*: XP\_005210702.1; *Caenorhabditis elegans*: NP\_496169.1)

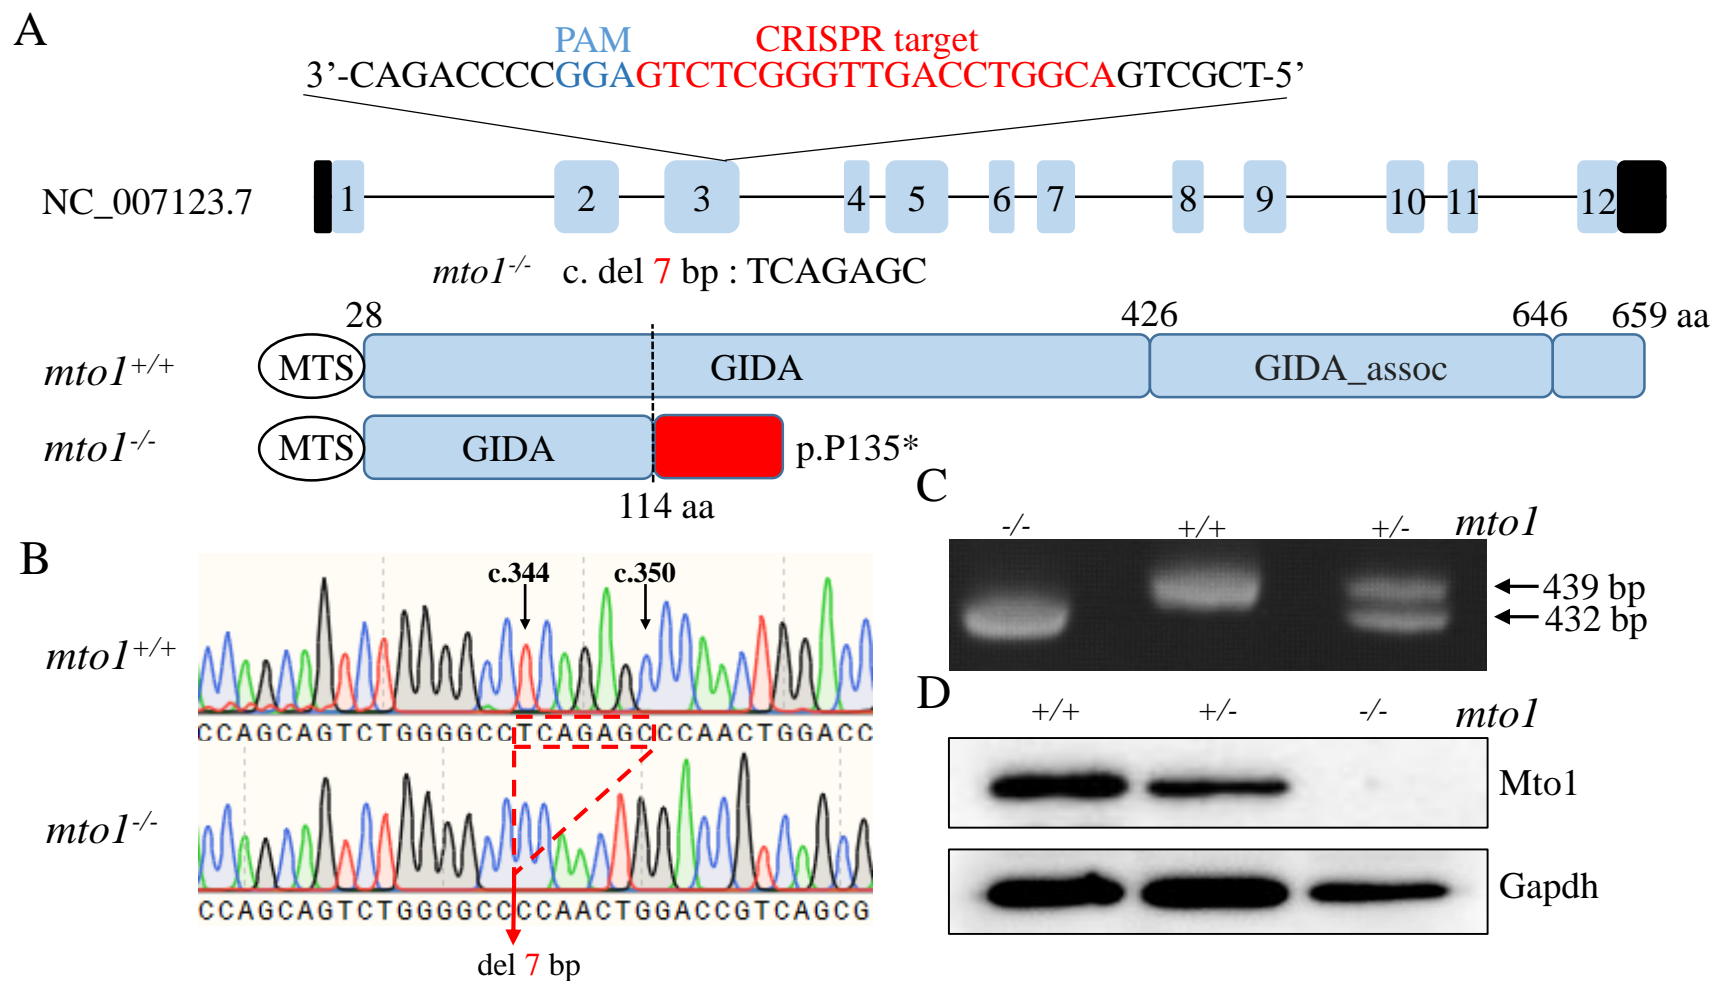

**supplemental Figure S2** (A) Schematic representation of CRISPR/Cas9 target site at exon 3 of zebrafish *mto1* gene as used in this study. Light blue boxes indicate coding region, black boxes indicate untranslated regions of exons and lines between exons indicate introns. The resultant truncated 135 aa non-functional protein caused by frame shifting deletion in *mto1* is shown in diagram. (B) Partial sequence chromatograms of exon 3 in the *mto1*<sup>+/+</sup> and *mto1*<sup>-/-</sup> zebrafish. The red arrow indicates the location of the nucleotide changes. (C, D) Genotyping of *mto1*<sup>del7bp</sup> by the PAGE and Western blot analyses.

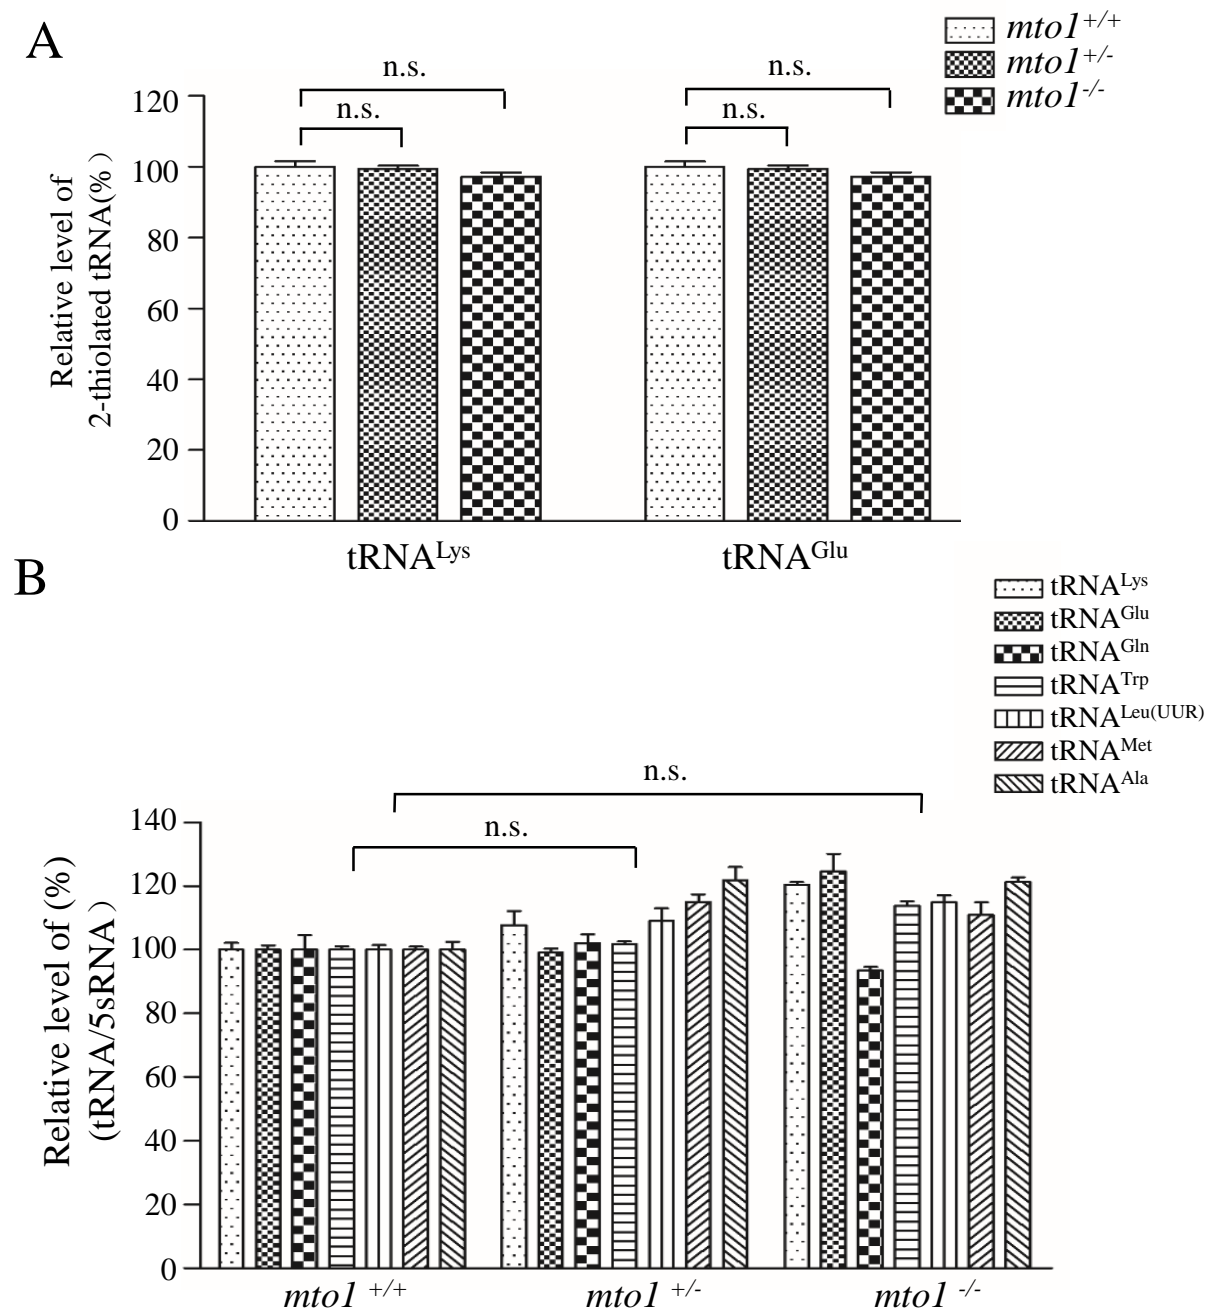

**Supplementary Figure S3. Quantification of the levels of mitochondrial tRNAs.** (A) Proportion in vivo of the 2-thiolated tRNA levels. The proportion values for the mutant zebrafish are expressed as percentages of the average values for the WT zebrafish. The calculations were based on three independent determinations of each tRNA in each fish. The error bars indicate standard deviations of the means; *P* indicates the significance, according to Student's *t* test, of the difference between mutant and WT for each tRNA. (B) Quantification of the levels of tRNAs. Average relative levels tRNA content were normalized to the average content in the mutant and WT 5S rRNA, respectively. The values for the *mto1*<sup>+/-</sup> and *mto1*<sup>-/-</sup> zebrafish are expressed as percentages of the average values for the WT zebrafish. The calculations were based on three independent determinations. Graph details and symbols are explained in the legend to Figure 3.

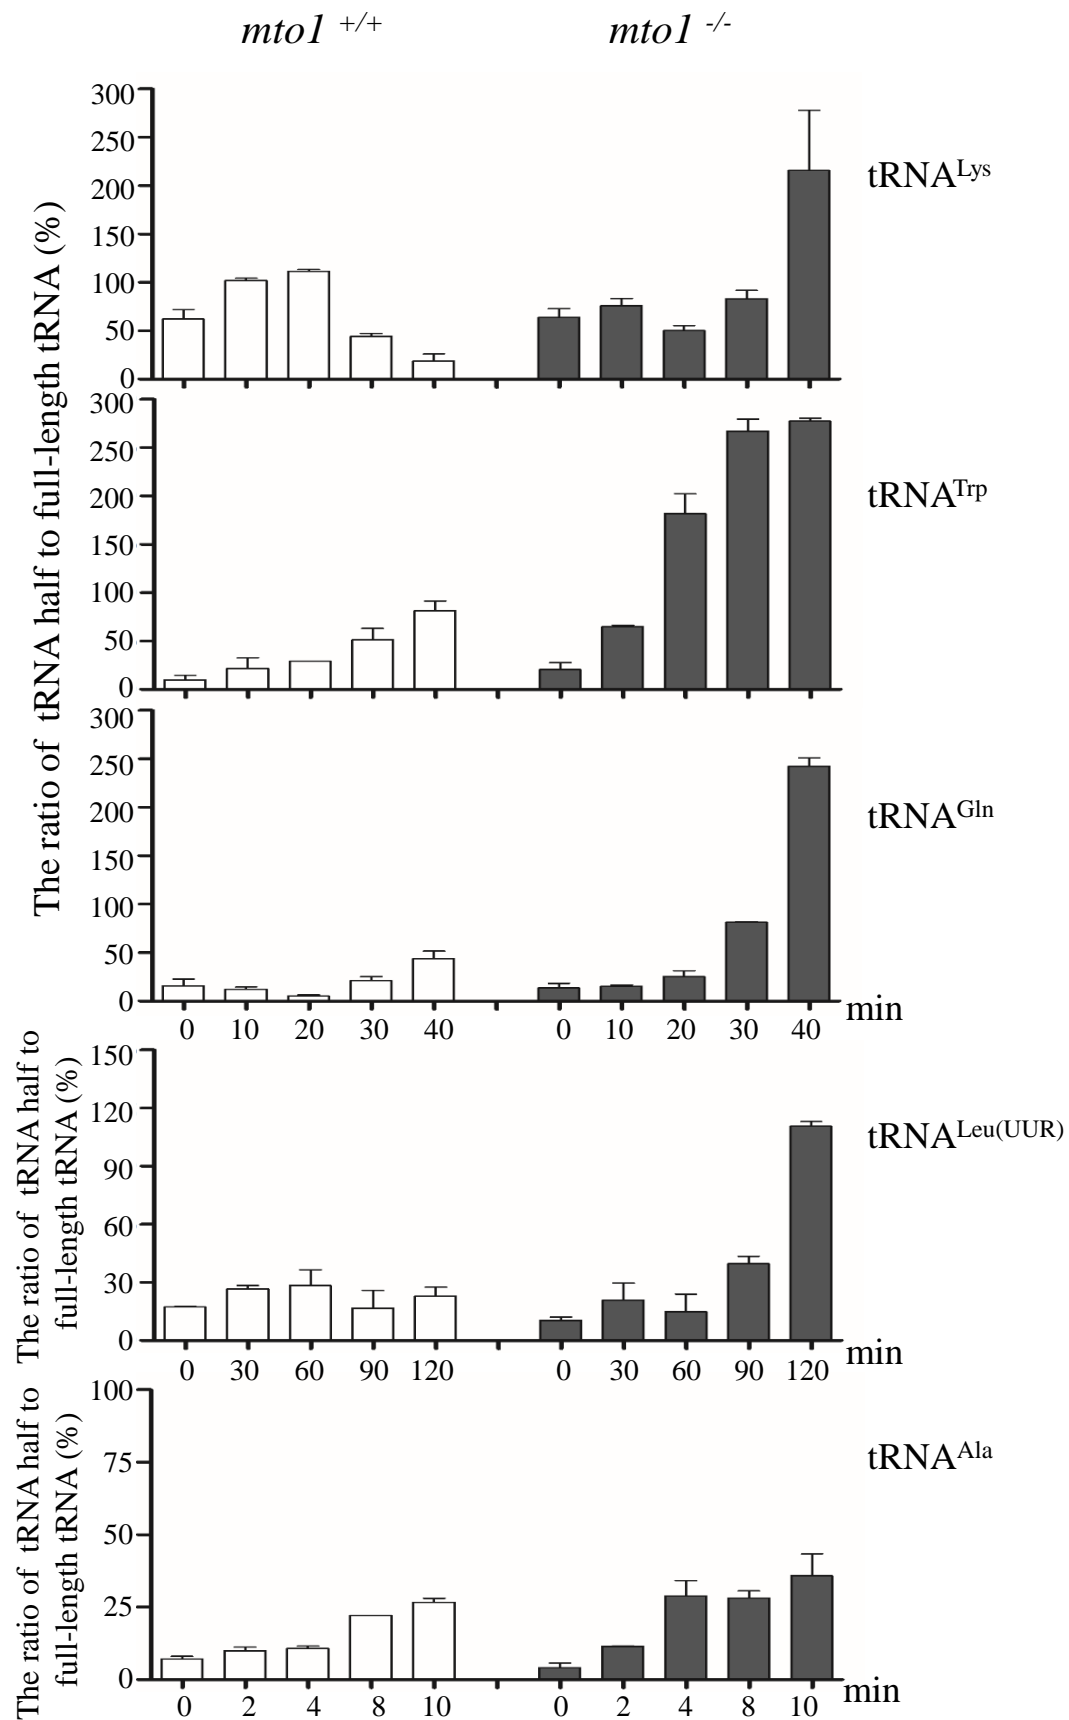

**Supplementary Figure S4. The ratios of tRNA half to full-length tRNA.** The ratios of tRNA half to full-length tRNA with S1 digestions of tRNA<sup>Lys</sup>, tRNA<sup>Trp</sup>, tRNA<sup>Gln</sup>, tRNA<sup>Leu(UUR)</sup> and tRNA<sup>Ala</sup>, purified from *mto1*<sup>-/-</sup> and WT zebrafish. The calculations were based on three independent determinations.

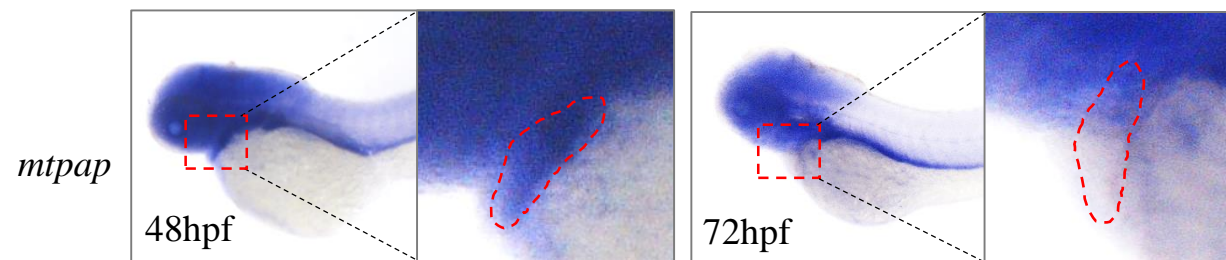

**Supplementary Figure S5. The expression patterns of Zebrafish Mtpap.** Whole-mount in situ hybridization (WISH) analysis of *mtpap* on WT larval zebrafish at 48 hpf and 72 hpf. Insets show higher magnifications of heart.

**Supplementary table S1. Sequences of oligodeoxynucleosides for Whole-mount *in situ* hybridization, Quantitative Real-time PCR, Immunoprecipitation, Poly(A) tail-length.**

| Experiment                     | Oligo                | Sequence                                        |
|--------------------------------|----------------------|-------------------------------------------------|
| ISH probe                      | Mto1-Probe-F         | CCAGACTATTGGGGCACT                              |
|                                | Mto1-Probe-R         | TTGACAATACGGGGAGGA                              |
|                                | Mtpap-Probe-F        | AAGCAACTATCCCACGCCAA                            |
|                                | Mtpap-Probe-R        | GAAGGCTGATGAGCAAAGCG                            |
|                                | Cmlc2-Probe-F        | CAGACCAACAGCAAAGCAG                             |
|                                | Cmlc2-Probe-R        | TGCAACTGAGTATGAAGTTTA                           |
| Quantitative Real-time PCR     | qpcr-aco2-F          | ATTGAGCGAGATGGCTATGC                            |
|                                | qpcr-aco2-R          | CAAAGCATGAGTTGCAGGG                             |
|                                | qpcr-ep300a-F        | CACCTCTTAACCAGGGAAGC                            |
|                                | qpcr-ep300a-R        | TAACGGCATTGTCCCTGTT                             |
|                                | qpcr-mtpap-F         | ACTGTAAACAGCTTCGGCAA                            |
|                                | qpcr-mtpap-R         | CACCTGGTACTCCAGAGACA                            |
|                                | qpcr-pnpo-F          | CTTGCAACAGCGACTAAGGA                            |
|                                | qpcr-pnpo-R          | CTCCAGCTCTGAACCTTTCC                            |
|                                | qpcr-tnrc6b-F        | GGCATGGGCTTAAACGAGTA                            |
|                                | qpcr-tnrc6b-R        | CATCCCTCCTCCGCTACTAA                            |
|                                | qpcr-lpl-F           | GAATACACGGCGAGAAGGAG                            |
|                                | qpcr-lpl-R           | GTCAACAGGAAAGACACGGT                            |
|                                | qpcr-pgp-F           | TGTGTCGCAAGTCAGTTCAA                            |
|                                | qpcr-pgp-R           | TGCGGACATTCACTCTTCTG                            |
|                                | qpcr-mrtfab-F        | GCCATTGAAGGAACGCAAAA                            |
|                                | qpcr-mrtfab-R        | TTCTCTGTTCGTGGAAAGC                             |
|                                | qpcr-ef1 $\alpha$ -F | TACAAATGCGGTGGAATCGAC                           |
|                                | qpcr-ef1 $\alpha$ -R | GTCAGCCTGAGAAGTACCAGT                           |
|                                | qpcr-mto1-F          | GCTGGGCAAATAAATGG                               |
|                                | qpcr-mto1-R          | GTGCGTGACAAGGACAAT                              |
| Immunoprecipitation (IP) assay | MTO1 flag XhoI R     | CCTCGAGGCATAACTCTCTCTTGAAGTCTGT                 |
|                                | MTO1 flag EcoRI F    | GGAATTCGCCACCATGTTCTACTTCCGAGGCT                |
| Poly(A) tail-length assay      | linker               | Phospho-ATGTGAGATCATGCACAGTCATA-NH <sub>2</sub> |
|                                | anti-linker          | TATGACTGTGCATGATCTCACAT                         |
|                                | inner anti-linker    | GACTGTGCATGATCTCACAT                            |
|                                | cox1 upper           | CTACCCAGACGCCTATGCAC                            |
|                                | cox1 lower           | ACCGCAACAAATGTAGAATG                            |
|                                | cox3 upper           | GCCTCATGGAAGGAGAACGA                            |
|                                | cox3 lower           | AGCTGTATGCCTTCTACGCC                            |
|                                | nd1 upper            | AGCATCGTTTACCCCAGATGC                           |
|                                | nd1 lower            | CCCACGATTCCGATACGACC                            |
|                                | cytb upper           | TCGCATACGCCATTCTACGA                            |
|                                | cytb lower           | ACCCCTACATCATCATTGGACA                          |

## Supplementary Table S2. The sequence of tRNA probe

| tRNA Probe                   | Sequence                        |
|------------------------------|---------------------------------|
| mt-tRNA <sup>Lys</sup>       | TCACTAAGGGTGGTTCGGTAAGCACCAAGTT |
| mt-tRNA <sup>Glu</sup>       | AATTCTTACTCAGACTTTAACTGAGACCGG  |
| mt-tRNA <sup>Gln</sup>       | TTAGAAAGAAGGGGGTTCGAACCCATGCCCA |
| mt-tRNA <sup>Leu</sup> (UUR) | GGCCTTTTGCAATTACCGAGCTCTGCCATC  |
| mt-tRNA <sup>Trp</sup>       | TCTACTGAGAGCTTTGAAGGCTCTTGGTCT  |
| mt-tRNA <sup>Ala</sup>       | TAGGACTTACAGACGTTACTCCGCATCTTC  |
| mt-tRNA <sup>Met</sup>       | TGATGAAGGAGGGACTTTAACCATCATGTT  |
| 5S rRNA                      | GCAACCTAGTTTTCCCATGTGGTCTCCCAT  |
